# Supplementary material for: Directed Fusion of Mesenchymal Stem Cells with Cardiomyocytes via VSV-G Facilitates Stem Cell Programming
Source: PubMed Central journal article supplement (PMC3369562; doi:10.1155/2012/414038), 2012-05-30

A

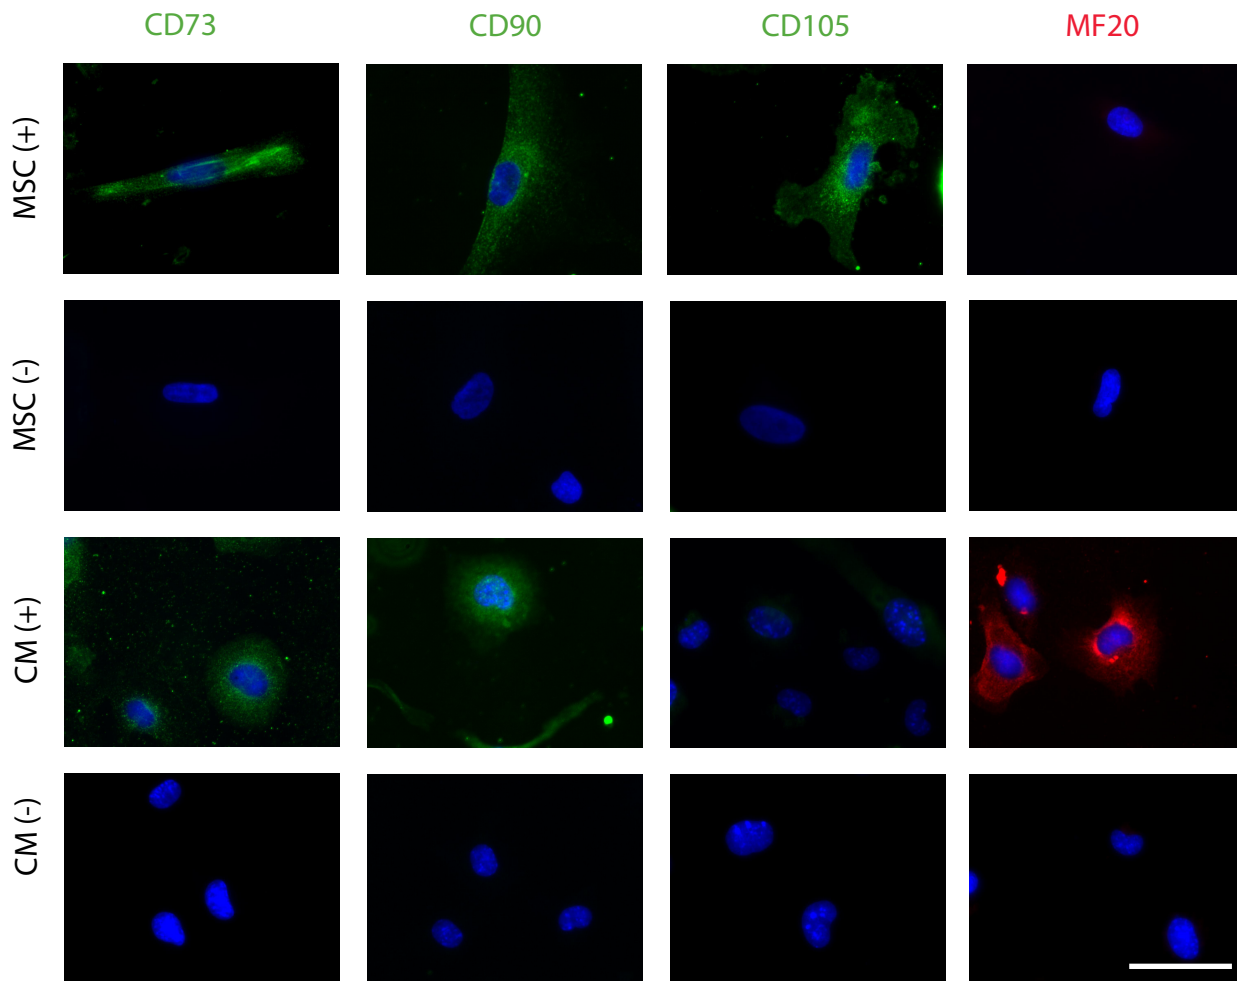

B

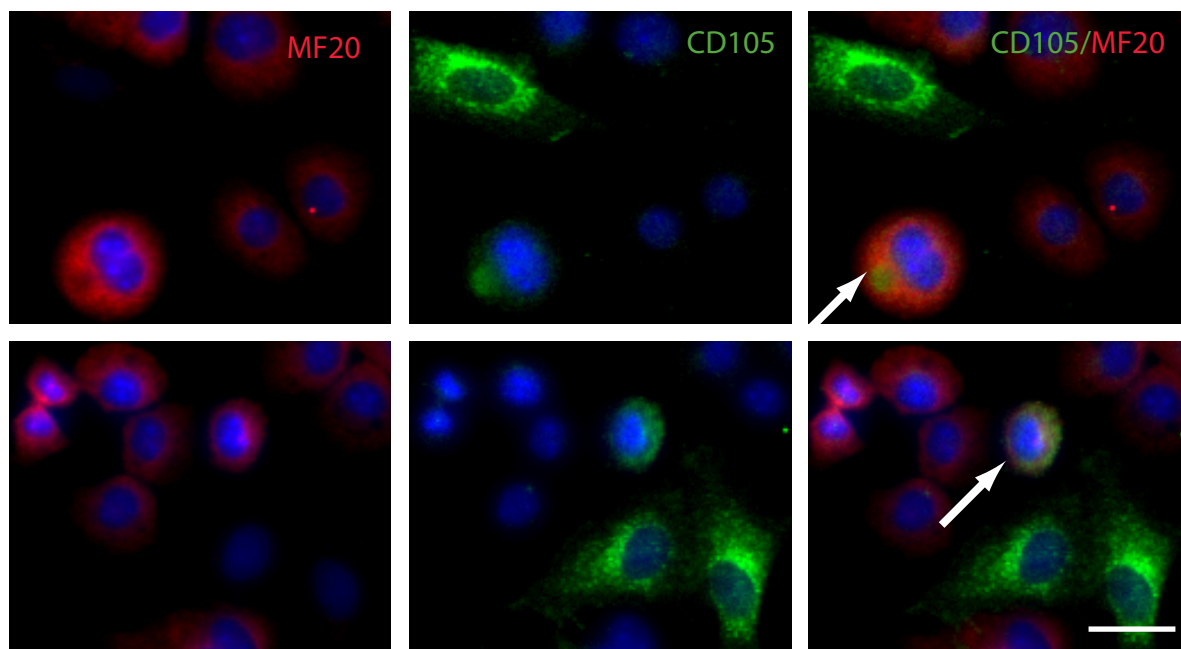

Supplement: 414038.f1.pdf [file 414038.f1.pdf]
