# Supplementary figures and images for: Directed Fusion of Mesenchymal Stem Cells with Cardiomyocytes via VSV-G Facilitates Stem Cell Programming
Source: Hindawi journal article supplement (doi:10.1155/2012/414038), 2012-01-01

A

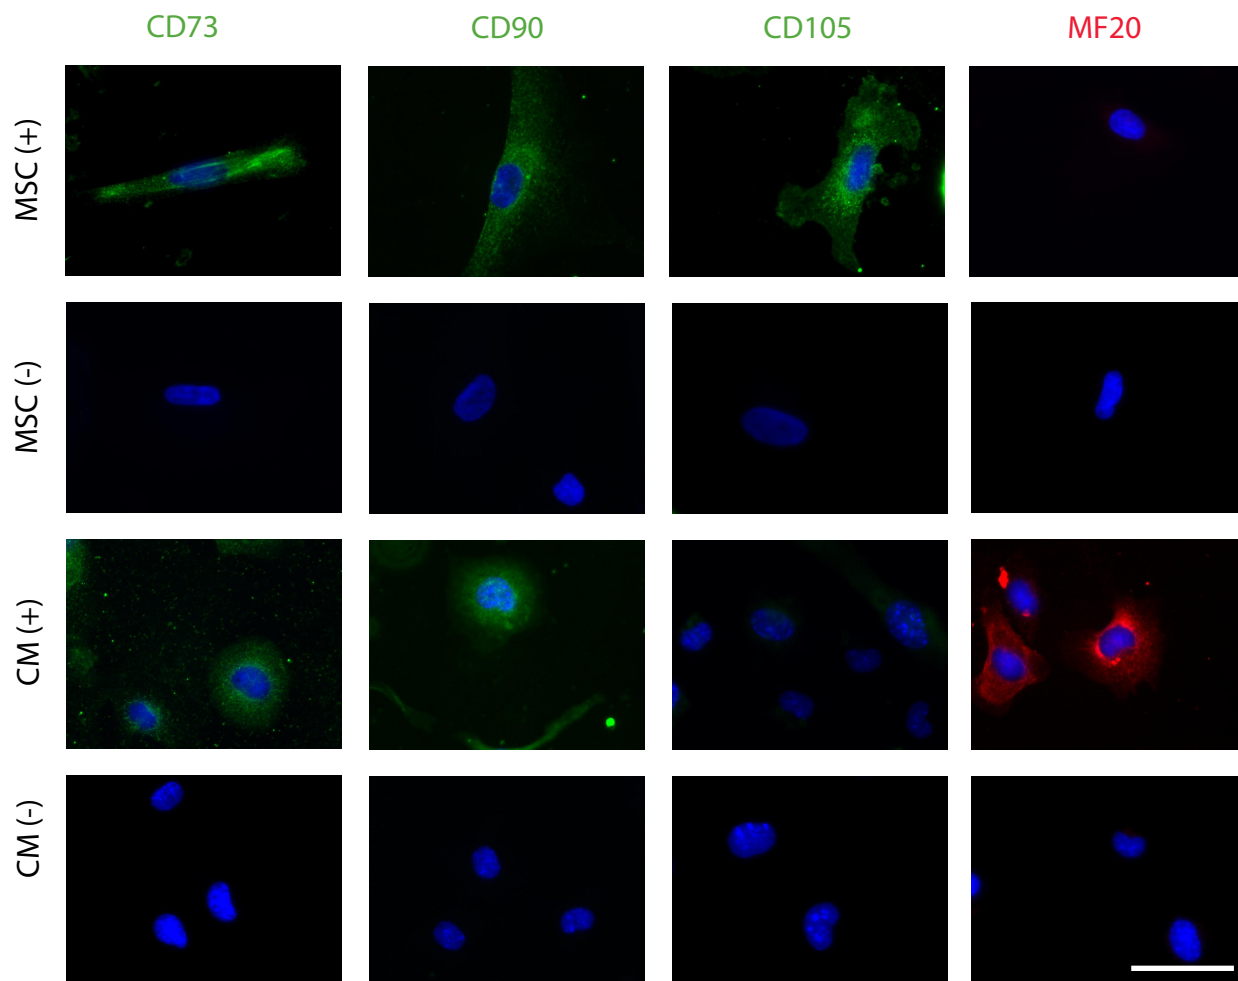

B

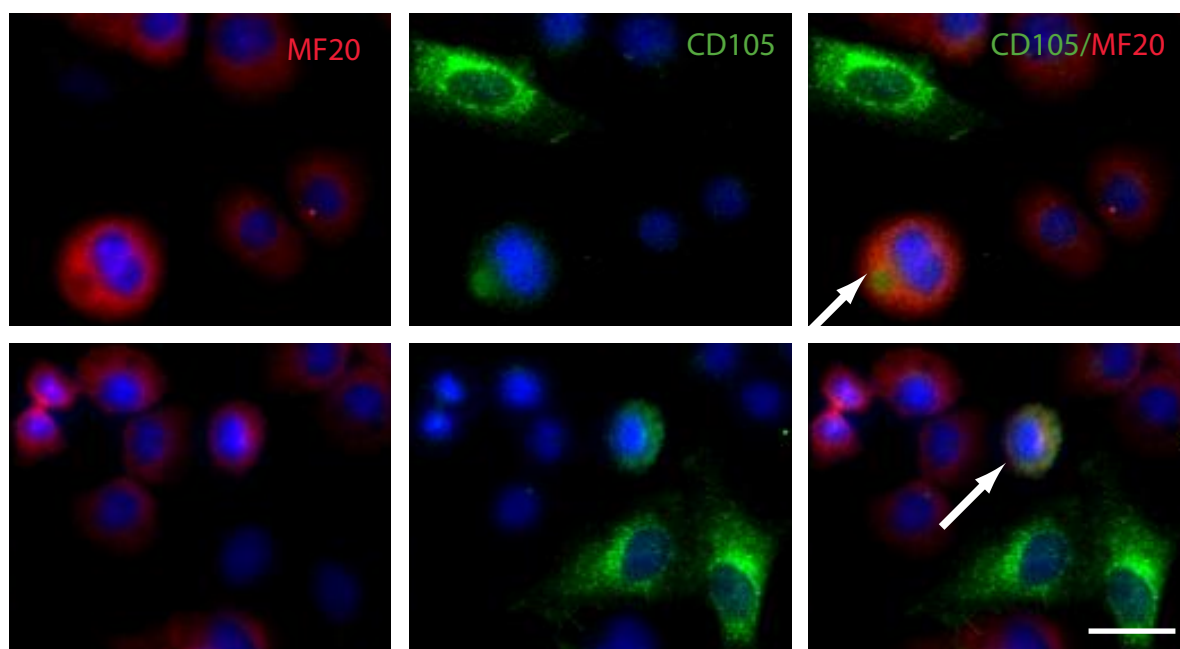

Supplement: f1 [file 414038.f1.pdf]
